# Supplementary material for: Noble metal-free Bi nanoparticles supported on TiO2with plasmon-enhanced visible light photocatalytic air purification
Source: Royal Society of Chemistry journal article supplement (doi:10.1039/c6en00341a), 2016-01-01
Supplement: c6en00341a1.pdf [file c6en00341a1.pdf]

## Electronic Supplementary Information for

# Noble Metal-Free Bi Nanoparticles Supported TiO<sub>2</sub> with Plasmon-Enhanced Visible Light Photocatalytic Air Purification

Zaiwang Zhao<sup>a</sup>, Wendong Zhang<sup>b</sup>, Xiaoshu Lv,<sup>a</sup> Yanjuan Sun<sup>a</sup>, Fan Dong<sup>\*,a</sup>, and  
Yuxin Zhang<sup>\*,c</sup>

<sup>a</sup> Chongqing Key Laboratory of Catalysis and Functional Organic Molecules, Engineering Research Center for Waste Oil Recovery Technology and Equipment of Ministry of Education, College of Environment and Resources, Chongqing Technology and Business University, 400067 Chongqing, China.

<sup>b</sup> Department of Scientific Research Management, Chongqing Normal University, Chongqing, 401331, China.

<sup>c</sup> College of Materials Science and Engineering, National Key Laboratory of Fundamental Science of Micro/Nano-Devices and System Technology, Chongqing University, Chongqing 400044, China.

\*To whom correspondence should be addressed.

E-mail: dfctbu@126.com (Fan Dong), zhangyuxin@cqu.edu.cn (Yuxin Zhang).

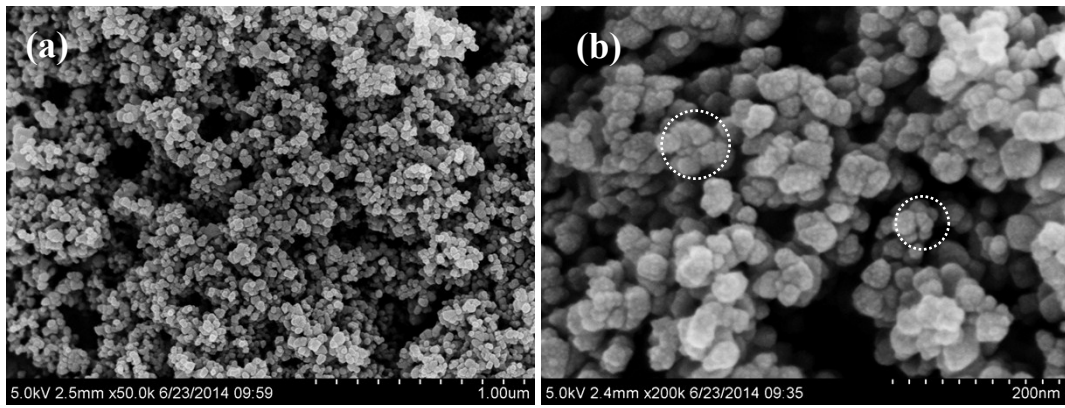

**Fig. S1** SEM images (a) and the enlarged view (b) of Bi-Ti-10 sample.

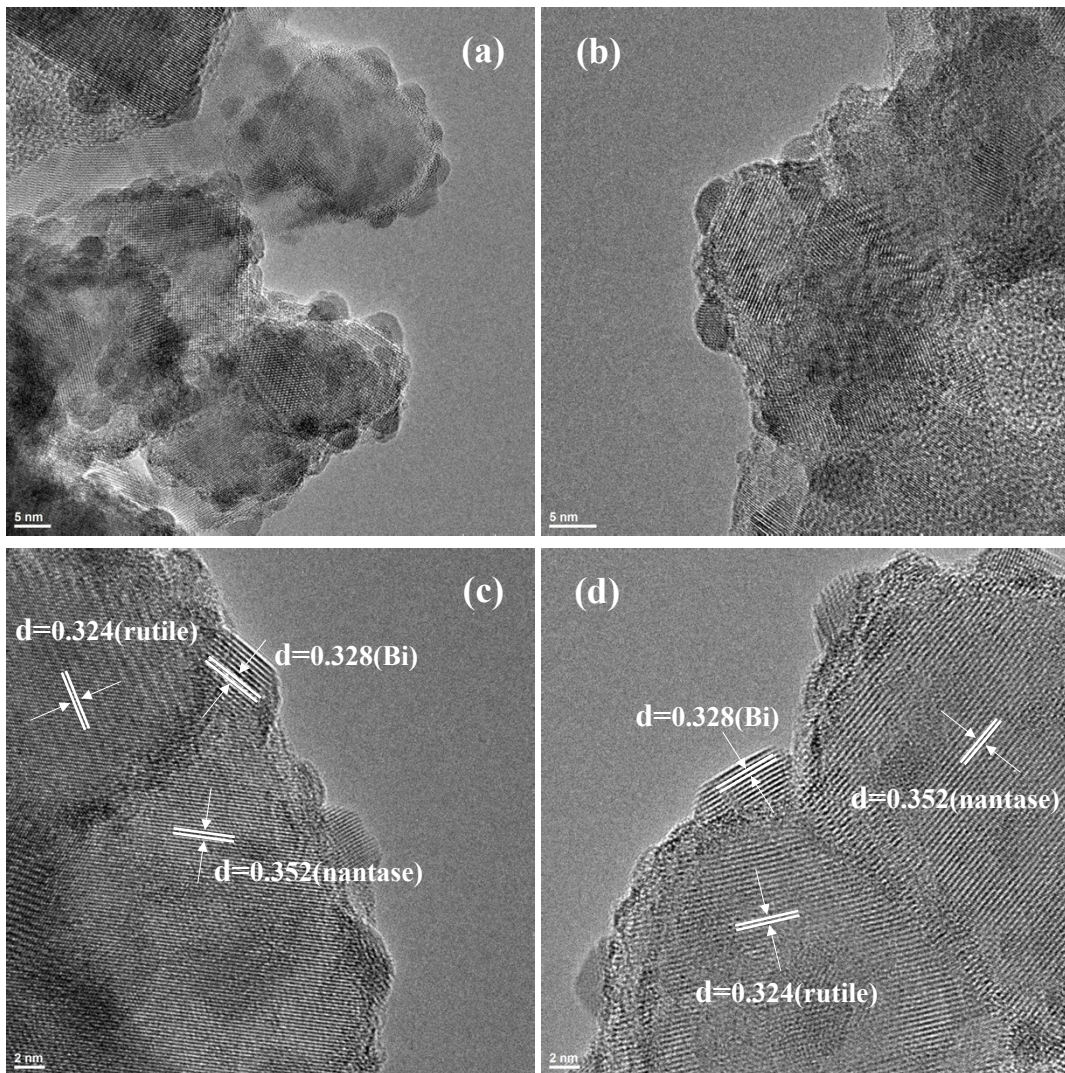

**Fig. S2** TEM images (a, b) and HRTEM images (c, d) of the Bi-Ti-200 sample.

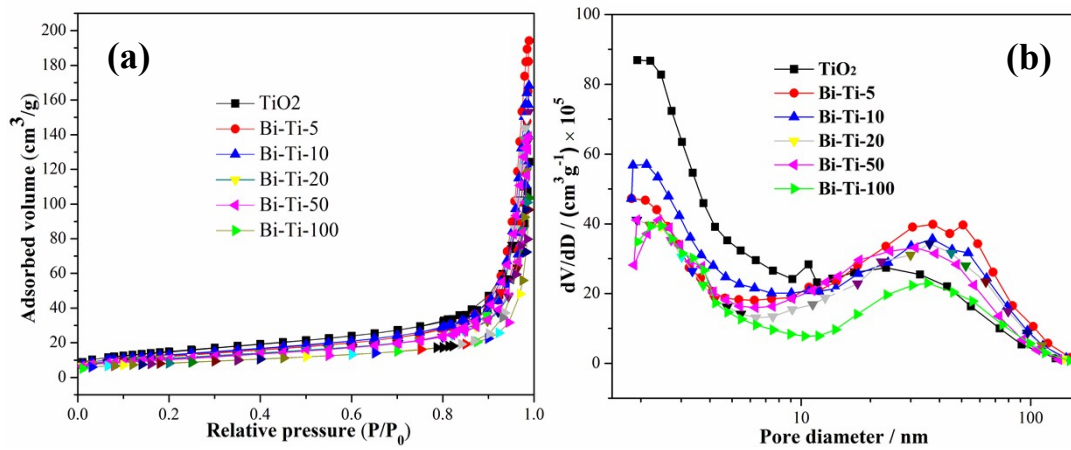

**Fig. S3** N<sub>2</sub> adsorption-desorption isotherms (a) and pore-size distribution curves (b) for pure Bi, TiO<sub>2</sub> and the BiNPs/TiO<sub>2</sub> nanocomposites.

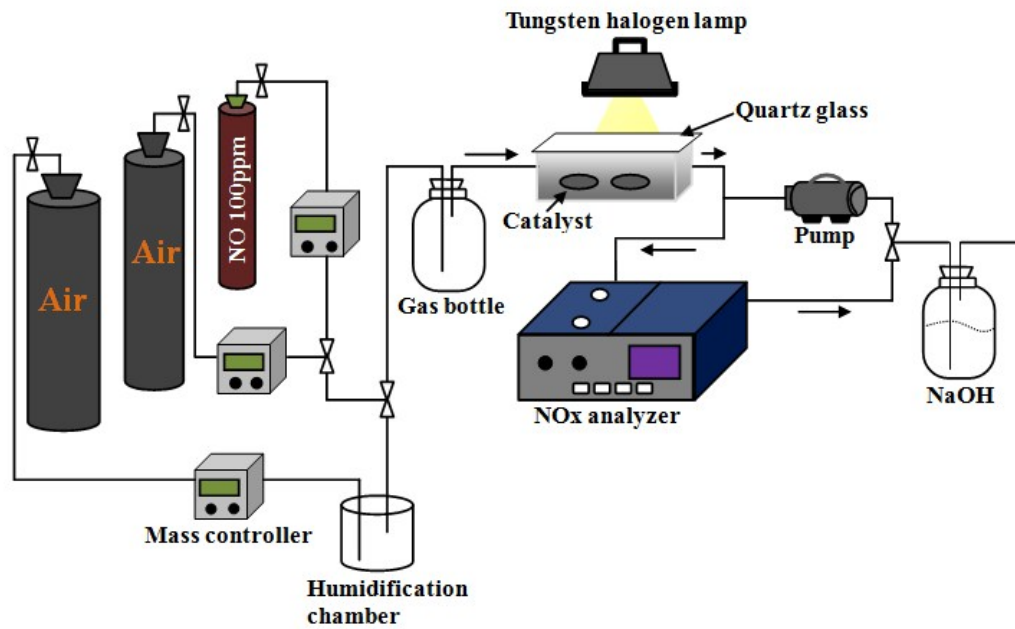

**Fig. S4** The diagrams of equipment for NO removal.

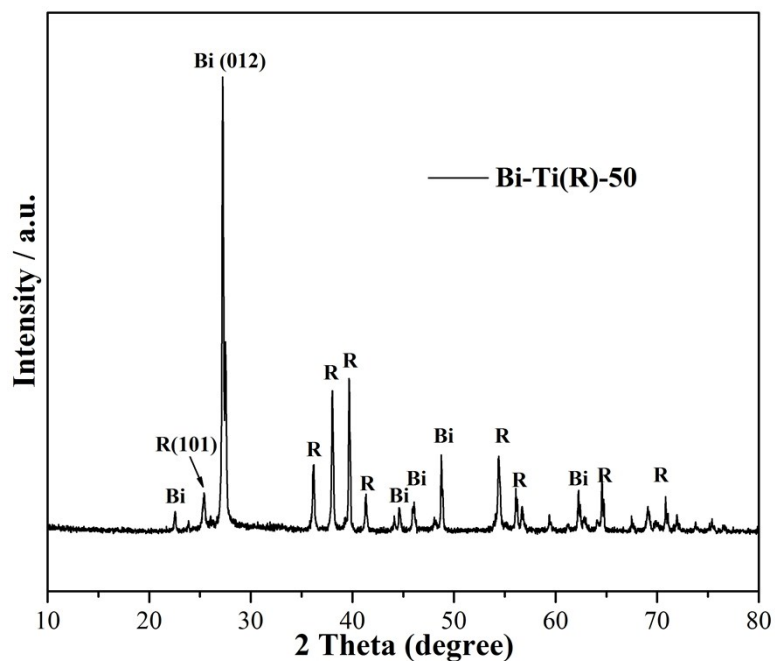

**Fig. S5** The XRD of the Bi-Ti(R)-50 (R stands for rutile)

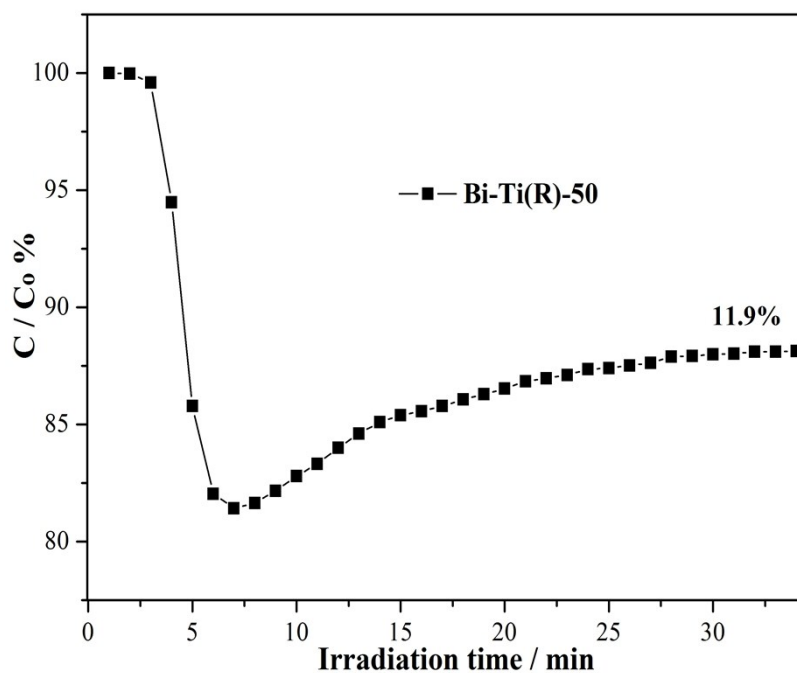

**Fig. S6** The photocatalytic activities of compared Bi-Ti(R)-50 (R stands for the pure phase of TiO<sub>2</sub> which is obtained for pre-treatment of P25 at 700 °C, the results demonstrates that the Bi-Ti(R)-50 show negligible photocatalytic performance (11.9%), compared with the optimized Bi-Ti-50, 48.2% )
